# Supplementary material
Source: PubMed Central journal article supplement (PMC3769104)
Supplement: NIHMS486289-supplement-01.pdf [file NIHMS486289-supplement-01.pdf]

Supplemental Table 1. Prevalence of high LDL-cholesterol and high cholesterol awareness, treatment, and control in demographic sub-groups of US adults, 1999-2000 through 2009-2010

|                    | Calendar period                                         |                       |                       |                       |                       |                       | Linear p-value | Quadratic p-value |
|--------------------|---------------------------------------------------------|-----------------------|-----------------------|-----------------------|-----------------------|-----------------------|----------------|-------------------|
|                    | 1999-2000<br>(n=1659)                                   | 2001-2002<br>(n=1897) | 2003-2004<br>(n=1697) | 2005-2006<br>(n=1692) | 2007-2008<br>(n=2041) | 2009-2010<br>(n=2316) |                |                   |
|                    | <b>Prevalence of high LDL-cholesterol, %</b>            |                       |                       |                       |                       |                       |                |                   |
| Age < 50 years     | 23.4 (1.5)                                              | 23.3 (1.6)            | 19.4 (1.4)            | 20.1 (1.9)            | 19.1 (1.7)            | 20.6 (1.7)            | 0.064          | 0.213             |
| 50-64 years        | 58.8 (2.5)                                              | 54.9 (2.7)            | 51.8 (4.1)            | 49.9 (3.3)            | 57.6 (1.7)            | 55.4 (2.7)            | 0.798          | 0.078             |
| ≥ 65 years         | 67.2 (1.8)                                              | 62.7 (2.5)            | 70.5 (2.2)            | 62.1 (2.3)            | 65.8 (2.5)            | 67.5 (2.5)            | 0.889          | 0.458             |
| Men                | 44.6 (1.5)                                              | 41.9 (2.3)            | 39.3 (2.3)            | 37.1 (2.4)            | 41.7 (2.7)            | 42.0 (1.3)            | 0.337          | 0.011             |
| Women              | 30.3 (1.7)                                              | 30.7 (1.4)            | 31.0 (2.1)            | 31.5 (2.7)            | 31.9 (1.8)            | 33.9 (2.1)            | 0.159          | 0.677             |
| Non-Hispanic white | 39.8 (2.0)                                              | 38.6 (2.1)            | 37.6 (1.8)            | 35.1 (2.4)            | 38.6 (2.4)            | 41.1 (1.7)            | 0.782          | 0.043             |
| Non-Hispanic black | 27.1 (2.6)                                              | 35.0 (2.8)            | 28.8 (2.4)            | 30.9 (2.2)            | 33.5 (3.0)            | 34.2 (3.7)            | 0.226          | 0.974             |
| Hispanics          | 30.0 (3.2)                                              | 22.9 (2.8)            | 29.2 (2.7)            | 29.2 (2.2)            | 29.9 (2.2)            | 29.5 (2.2)            | 0.496          | 0.639             |
|                    | <b>Awareness of high LDL-cholesterol<sup>I</sup>, %</b> |                       |                       |                       |                       |                       |                |                   |
| Age < 50 years     | 38.9 (5.1)                                              | 38.5 (4.0)            | 44.3 (3.8)            | 47.0 (2.5)            | 44.1 (6.6)            | 47.9 (4.5)            | 0.116          | 0.753             |
| 50-64 years        | 55.8 (5.4)                                              | 61.9 (2.7)            | 70.1 (3.9)            | 67.4 (4.9)            | 66.3 (3.6)            | 64.6 (3.7)            | 0.164          | 0.072             |
| ≥ 65 years         | 55.6 (4.8)                                              | 56.0 (3.0)            | 74.7 (3.0)            | 71.9 (1.7)            | 69.0 (2.1)            | 70.9 (3.0)            | 0.001          | 0.013             |
| Men                | 45.0 (4.3)                                              | 48.7 (3.5)            | 57.7 (3.8)            | 54.5 (2.9)            | 55.7 (4.1)            | 56.4 (2.4)            | 0.014          | 0.152             |
| Women              | 54.2 (2.8)                                              | 53.8 (3.3)            | 68.8 (2.5)            | 69.2 (2.5)            | 66.1 (3.4)            | 67.4 (1.4)            | <0.001         | 0.005             |
| Non-Hispanic white | 52.4 (3.2)                                              | 53.0 (2.3)            | 65.2 (3.2)            | 64.2 (2.1)            | 62.4 (3.7)            | 65.3 (2.5)            | <0.001         | 0.106             |
| Non-Hispanic black | 42.4 (4.9)                                              | 42.5 (3.7)            | 58.3 (3.6)            | 47.7 (3.1)            | 58.4 (6.7)            | 64.2 (5.5)            | 0.001          | 0.782             |
| Hispanics          | 28.4 (4.0)                                              | 29.9 (6.9)            | 43.3 (5.9)            | 47.2 (5.5)            | 49.9 (3.5)            | 46.4 (3.1)            | <0.001         | 0.082             |
|                    | <b>Treated for high LDL-cholesterol<sup>II</sup>, %</b> |                       |                       |                       |                       |                       |                |                   |
| Age < 50 years     | 20.3 (7.7)                                              | 43.5 (7.3)            | 42.4 (7.3)            | 43.1 (7.5)            | 56.0 (7.5)            | 53.8 (5.0)            | 0.001          | 0.249             |
| 50-64 years        | 47.2 (5.7)                                              | 58.1 (4.4)            | 66.7 (3.8)            | 66.3 (3.4)            | 72.3 (4.0)            | 68.5 (2.3)            | <0.001         | 0.027             |
| ≥ 65 years         | 56.5 (5.4)                                              | 65.2 (4.0)            | 66.6 (4.4)            | 83.3 (4.6)            | 83.5 (3.6)            | 81.9 (2.4)            | <0.001         | 0.315             |
| Men                | 43.0 (6.7)                                              | 52.3 (4.6)            | 67.4 (5.1)            | 65.9 (3.7)            | 73.6 (3.8)            | 72.1 (2.5)            | <0.001         | 0.081             |
| Women              | 39.4 (2.6)                                              | 59.3 (5.6)            | 54.6 (2.1)            | 66.6 (5.8)            | 71.6 (4.0)            | 67.9 (3.4)            | <0.001         | 0.053             |
| Non-Hispanic white | 42.2 (4.9)                                              | 57.5 (4.2)            | 59.6 (2.7)            | 65.9 (4.1)            | 73.7 (3.4)            | 70.2 (2.6)            | <0.001         | 0.061             |
| Non-Hispanic black | 41.7 (9.8)                                              | 44.5 (7.5)            | 58.3 (6.6)            | 72.5 (8.3)            | 68.5 (5.2)            | 63.8 (3.1)            | 0.002          | 0.077             |
| Hispanics          | 43.1 (5.6)                                              | 34.1 (9.0)            | 68.5 (9.2)            | 55.8 (10.6)           | 63.6 (4.5)            | 77.8 (3.1)            | <0.001         | 0.722             |
|                    | <b>Controlled<sup>III</sup>, %</b>                      |                       |                       |                       |                       |                       |                |                   |
| Age < 50 years     | 71.9 (10.3)                                             | 49.8 (6.8)            | 53.8 (10.4)           | 80.5 (7.2)            | 69.1 (4.9)            | 60.2 (7.1)            | 0.500          | 0.533             |
| 50-64 years        | 35.4 (8.3)                                              | 51.7 (6.6)            | 55.0 (7.4)            | 63.1 (6.7)            | 63.1 (3.1)            | 71.1 (3.0)            | <0.001         | 0.511             |
| ≥ 65 years         | 44.6 (7.8)                                              | 48.7 (4.3)            | 56.7 (3.3)            | 61.3 (4.4)            | 59.0 (3.9)            | 58.7 (5.3)            | 0.080          | 0.192             |
| Men                | 33.3 (4.3)                                              | 52.2 (4.7)            | 44.0 (5.0)            | 62.0 (5.4)            | 56.9 (5.1)            | 62.5 (3.3)            | <0.001         | 0.361             |
| Women              | 59.6 (6.6)                                              | 48.4 (7.1)            | 69.6 (4.6)            | 68.1 (4.9)            | 68.4 (4.0)            | 64.8 (3.6)            | 0.080          | 0.139             |

|                    |            |             |            |             |            |            |        |       |
|--------------------|------------|-------------|------------|-------------|------------|------------|--------|-------|
| Non-Hispanic white | 46.2 (4.2) | 50.5 (3.1)  | 55.8 (4.8) | 65.4 (4.5)  | 61.0 (2.7) | 67.2 (3.8) | <0.001 | 0.496 |
| Non-Hispanic black | 17.4 (9.3) | 30.1 (14.0) | 55.2 (9.7) | 51.8 (6.8)  | 63.4 (7.2) | 45.3 (6.3) | 0.075  | 0.006 |
| Hispanics          | 76.1 (8.2) | 49.5 (10.8) | 41.8 (7.6) | 55.9 (10.7) | 59.2 (6.5) | 63.5 (5.4) | 0.695  | 0.029 |

Numbers in table are percent (standard error)

LDL= low-density lipoprotein

† Among all individuals with high LDL-cholesterol

†† Among individuals aware of their diagnosis of high LDL-cholesterol

††† Among those treated for high LDL-cholesterol

Supplemental Table 2. Prevalence of high LDL-cholesterol and high cholesterol awareness, treatment, and control by CHD risk categories, 1999-2000 through 2009-2010

|                              | Calendar period                                         |                       |                       |                       |                       |                       | Linear p-value | Quadratic p-value |
|------------------------------|---------------------------------------------------------|-----------------------|-----------------------|-----------------------|-----------------------|-----------------------|----------------|-------------------|
|                              | 1999-2000<br>(n=1659)                                   | 2001-2002<br>(n=1897) | 2003-2004<br>(n=1697) | 2005-2006<br>(n=1692) | 2007-2008<br>(n=2041) | 2009-2010<br>(n=2316) |                |                   |
| <b>ATP-III Risk Category</b> | <b>Prevalence of high LDL-cholesterol, %</b>            |                       |                       |                       |                       |                       |                |                   |
| 0-1 risk factors             | 16.3 (1.6)                                              | 15.9 (1.2)            | 12.9 (1.0)            | 17.3 (1.7)            | 15.8 (1.3)            | 18.1 (0.8)            | 0.173          | 0.139             |
| 2+ risk factors              | 65.7 (3.5)                                              | 59.0 (3.2)            | 64.1 (3.0)            | 56.3 (3.7)            | 61.8 (2.5)            | 63.0 (2.6)            | 0.644          | 0.194             |
| CHD or risk equivalent       | 81.0 (3.4)                                              | 81.2 (2.0)            | 80.9 (3.2)            | 75.7 (2.5)            | 77.1 (3.3)            | 82.2 (1.8)            | 0.691          | 0.172             |
| CHD at very high risk        | 99.6 (0.5)                                              | 94.6 (2.8)            | 97.4 (1.4)            | 90.6 (3.9)            | 95.7 (1.8)            | 94.9 (2.3)            | 0.163          | 0.151             |
| <b>ATP-III Risk Category</b> | <b>Awareness of high LDL-cholesterol<sup>†</sup>, %</b> |                       |                       |                       |                       |                       |                |                   |
| 0-1 risk factors             | 47.7 (4.5)                                              | 56.5 (4.9)            | 64.4 (6.1)            | 64.9 (3.0)            | 68.5 (4.7)            | 69.1 (5.2)            | 0.001          | 0.250             |
| 2+ risk factors              | 45.8 (4.1)                                              | 43.5 (3.3)            | 53.7 (3.8)            | 56.5 (3.8)            | 53.2 (4.9)            | 48.7 (2.9)            | 0.149          | 0.070             |
| CHD or risk equivalent       | 50.8 (5.0)                                              | 51.6 (5.5)            | 73.1 (3.3)            | 58.3 (4.7)            | 56.6 (5.2)            | 66.9 (2.8)            | 0.033          | 0.322             |
| CHD at very high risk        | 65.8 (8.2)                                              | 65.7 (4.8)            | 70.1 (5.0)            | 75.1 (4.2)            | 72.9 (4.1)            | 66.7 (4.5)            | 0.532          | 0.251             |
| <b>ATP-III Risk Category</b> | <b>Treated for high LDL-cholesterol<sup>††</sup>, %</b> |                       |                       |                       |                       |                       |                |                   |
| 0-1 risk factors             | 38.2 (6.7)                                              | 49.5 (6.2)            | 53.0 (6.0)            | 55.8 (6.8)            | 64.3 (6.9)            | 62.3 (5.5)            | 0.004          | 0.473             |
| 2+ risk factors              | 33.9 (3.8)                                              | 49.7 (6.2)            | 55.4 (6.3)            | 57.1 (5.2)            | 64.3 (6.4)            | 59.3 (4.7)            | <0.001         | 0.038             |
| CHD or risk equivalent       | 46.1 (10.1)                                             | 58.5 (5.3)            | 65.1 (4.7)            | 80.6 (4.7)            | 85.1 (2.6)            | 83.0 (2.8)            | <0.001         | 0.339             |
| CHD at very high risk        | 68.3 (9.6)                                              | 84.6 (3.7)            | 84.9 (4.3)            | 88.0 (6.1)            | 87.1 (5.0)            | 87.3 (5.3)            | 0.089          | 0.221             |
| <b>ATP-III Risk Category</b> | <b>Controlled LDL-cholesterol<sup>†††</sup>, %</b>      |                       |                       |                       |                       |                       |                |                   |
| 0-1 risk factors             | 83.4 (8.1)                                              | 79.3 (7.9)            | 96.6 (1.9)            | 94.9 (2.9)            | 83.9 (4.1)            | 93.4 (2.9)            | 0.232          | 0.385             |
| 2+ risk factors              | 49.3 (9.6)                                              | 44.7 (8.6)            | 58.7 (6.6)            | 62.2 (8.6)            | 57.0 (8.0)            | 52.3 (5.4)            | 0.505          | 0.216             |
| CHD or risk equivalent       | 30.0 (8.0)                                              | 44.3 (5.1)            | 49.6 (6.1)            | 54.7 (5.7)            | 67.5 (3.4)            | 58.3 (5.9)            | 0.001          | 0.120             |
| CHD at very high risk        | 1.6 (1.8)*                                              | 21.3 (7.7)*           | 3.8 (2.1)*            | 35.1 (10.7)*          | 26.4 (6.2)*           | 19.9 (6.3)*           | *              | *                 |

\* Unstable estimate due to few (n<20) people in each cell. Due to the instability, p-values were not calculated.

Numbers in table are percent (standard error)

LDL= low-density lipoprotein

<sup>†</sup> Among all individuals with high LDL-cholesterol

<sup>††</sup> Among individuals aware of their diagnosis of high LDL-cholesterol

<sup>†††</sup> Among those treated for high LDL-cholesterol

CHD risk categories were defined by (1) 0-1 risk factors - no CHD or CHD risk equivalents and 0-1 major CHD risk factors, (2) 2+ risk factors - no CHD or CHD risk equivalents and two or more major CHD risk factors, (3) CHD or risk equivalent - CHD not at very high risk and/or CHD risk equivalents and (4) CHD at very high risk - CHD with cigarette smoking, diabetes mellitus, or metabolic syndrome. See Table 1 for definitions of CHD risk factors and CHD risk equivalents.
